# Supplementary material for: Desiccation tolerance in Acinetobacter baumannii is mediated by the two-component response regulator BfmR
Source: PubMed Central journal article supplement (PMC6181384; doi:10.1371/journal.pone.0205638), 2018-10-11
Supplement: pone.0205638.s001.pdf [file pone.0205638.s001.pdf]

Table S1. Primers used in this study.

| Primer                                  | Sequence (5'→3') <sup>a, b</sup>                   |
|-----------------------------------------|----------------------------------------------------|
| Generation of mutant strains            |                                                    |
| bfmR-P1                                 | aaaaaaaa <u>ctgcag</u> aggaacacgtaatgacaaatcacc    |
| bfmR-P2                                 | ttgtaaaatctgattaacttcctataagggtg                   |
| bfmR-P3                                 | cagaatcttggtaacttttctcttggt                        |
| bfmR-P4                                 | aaaaaaaa <u>ctgcag</u> ttgatcgcgatagataacgtaagc    |
| bfmRC254T InvF                          | caacattaagattggtgatgatag                           |
| bfmRC254T InvR                          | aTgCGcgTactgaagatatgg                              |
| bfmRT689C InvF                          | gtaaccttactacgtacag                                |
| bfmRT689C InvR                          | tCgttGttaaagaaaccaatgg                             |
| AbSP-P1                                 | aaa <u>actgcag</u> ggcatctaacatagacaacgaattgg      |
| AbSP-P2                                 | cgTggattTgcaagTatggatcctcagatggTcgTggccagaactctc   |
| AbSP-P3                                 | gagagTtctggccacgaccatctgaaggatccatactgcaaTccacg    |
| AbSP-P4                                 | aaa <u>actgcag</u> cttcaacaattgatcgattacctg        |
| katE-P1                                 | aaa <u>agaatt</u> cttggctaaatgatacaggtaatcg        |
| katE-P2                                 | gTtagacacagTtagagatgatgcaattgaagatgagTtccagcatgttg |
| katE-P3                                 | caacatgctggaactcatctcaattgatcatctctaactgtgtctaac   |
| katE-P4                                 | aaa <u>agaatt</u> cacatgtctgtatctatgatgacc         |
| Cloning <i>bfmR</i> for complementation |                                                    |
| bfmR comp F                             | ttttt <u>ctgcag</u> ggaagttaatcagattttacaatccattgg |
| bfmR comp R                             | tttttt <u>gaatt</u> catgccacgatattgagggataaacac    |

<sup>a</sup>Underlined sequence denotes a restriction site utilized for cloning.

<sup>b</sup>Nucleotides shown in capital letters are altered compared to the original template sequence.
